# Supplementary material
Source: Copernicus journal article supplement (doi:10.5194/jm-45-335-2026)
Supplement: Supplementary file 1 [file jm-45-335-2026-supplement.pdf]

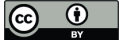

*Supplement of*

**Palynofacies and lacustrine sequence stratigraphy: a case example from the Jurassic Cañadón Asfalto Formation, Cañadón Asfalto Basin, Extra-Andean Patagonia, Argentina**

Daniela Elizabeth Olivera et al.

*Correspondence to:* Carlos Zavala (skd995108@sdust.edu.cn)

The copyright of individual parts of the supplement might differ from the article licence.

Table S1

| Repository number | Lycophyte<br>and fern<br>spores | Hirmerellaceae | Araucariaceae | Pinaceae | Podocarpaceae | Pteridospermales | Botryococcaceae | Acritarchs | Indeterminate<br>palynomorphs | PTs       |
|-------------------|---------------------------------|----------------|---------------|----------|---------------|------------------|-----------------|------------|-------------------------------|-----------|
| MPEF-PALIN136     |                                 | 65,9           |               | 1,6      |               | 0,4              | 23,3            |            | 8,8                           | <b>C</b>  |
| MPEF-PALIN134     |                                 | 58,4           | 12,0          |          |               |                  | 15,0            |            | 14,6                          | <b>A1</b> |
| MPEF-PALIN133     |                                 | 53,0           | 23,4          |          | 2,8           | 2,8              | 10,0            |            | 8,0                           | <b>A1</b> |
| MPEF-PALIN132     |                                 | 77,3           | 7,9           |          |               |                  |                 |            | 14,9                          | <b>A1</b> |
| MPEF-PALIN131     | 0,8                             | 71,5           | 10,7          |          | 0,4           |                  | 1,6             |            | 15,0                          | <b>A1</b> |
| MPEF-PALIN130     |                                 | 65,0           | 11,1          |          |               |                  | 3,7             |            | 20,2                          | <b>C</b>  |
| MPEF-PALIN129     |                                 | 82,0           | 5,1           |          | 0,5           |                  | 1,8             |            | 10,6                          | <b>C</b>  |
| MPEF-PALIN128     |                                 | 13,9           | 1,3           |          | 0,5           | 0,3              | 81,7            |            | 2,3                           | <b>B</b>  |
| MPEF-PALIN127     |                                 | 21,7           | 4,0           |          | 0,8           |                  | 60,6            |            | 12,9                          | <b>C</b>  |
| MPEF-PALIN126     | 2,2                             | 61,0           | 12,9          | 2,2      | 5,5           | 4,8              | 4,4             |            | 7,0                           | <b>A1</b> |
| MPEF-PALIN125     | 0,7                             | 51,5           | 4,4           |          | 2,4           | 0,7              | 20,5            |            | 19,9                          | <b>C</b>  |
| MPEF-PALIN124     |                                 | 53,3           | 3,8           |          | 1,5           | 0,8              | 9,6             |            | 31,0                          | <b>C</b>  |
| MPEF-PALIN123     |                                 | 14,3           | 0,9           | 1,1      | 2,0           | 0,6              | 79,4            |            | 1,7                           | <b>B</b>  |
| MPEF-PALIN122     |                                 | 86,3           | 6,5           | 1,9      | 0,4           | 0,8              |                 |            | 4,2                           | <b>C</b>  |
| MPEF-PALIN121     | 0,3                             | 78,5           | 5,8           | 0,6      | 1,5           | 0,3              | 0,3             | 0,9        | 11,8                          | <b>A1</b> |
| MPEF-PALIN120     |                                 | 75,7           | 16,0          |          |               |                  | 4,5             |            | 3,8                           | <b>C</b>  |
| MPEF-PALIN119     |                                 | 28,9           | 14,9          |          |               |                  | 38,2            |            | 18,1                          | <b>C</b>  |
| MPEF-PALIN116     |                                 | 5,8            |               |          |               |                  | 85,1            |            | 9,2                           | <b>C</b>  |
| MPEF-PALIN106     |                                 |                |               |          |               |                  | 100             |            | 0                             | <b>B</b>  |
| MPEF-PALIN104     |                                 |                |               |          |               |                  | 100             |            | 0                             | <b>B</b>  |

Table S2

|               | Pollen grains | Algae | Indeterminate palynomorphs | Biostructure Phytoclasts | Black-brown Fragments | Yellow-brown Fragments | Blade-shaped | Equidimensionals | Spongy AOM | Fibrous AOM | Granular AOM | Palynofacies-types | TOC   |       |
|---------------|---------------|-------|----------------------------|--------------------------|-----------------------|------------------------|--------------|------------------|------------|-------------|--------------|--------------------|-------|-------|
| MPEF-PALIN152 | 0             | 0     | 0,58                       | 20                       | 18,2                  | 2,11                   | 17,47        | 8,8              | 17,3       | 15,5        | 0            | A1                 |       |       |
| MPEF-PALIN151 | 0             | 0     | 0                          | 21,6                     | 21,3                  | 0,7                    | 12,89        | 4,9              | 24,7       | 13,9        | 0            |                    | 1,551 |       |
| MPEF-PALIN150 | 0             | 0     | 0,74                       | 21,8                     | 16,1                  | 4,25                   | 19,41        | 8,7              | 18,5       | 10,5        | 0            |                    |       |       |
| MPEF-PALIN149 | 0             | 0     | 0                          | 31,7                     | 25,4                  | 3,30                   | 26,99        | 12,6             | 0          | 0           | 0            |                    |       |       |
| MPEF-PALIN148 | 0             | 0,30  | 1,82                       | 27,5                     | 33,4                  | 5,31                   | 10,32        | 7,1              | 13,66      | 0,61        | 0            |                    | 0,85  |       |
| MPEF-PALIN147 | 0             | 0     | 0                          | 22,4                     | 26,4                  | 1,81                   | 13,38        | 13,6             | 15,01      | 7,41        | 0            |                    |       |       |
| MPEF-PALIN146 | 0             | 0     | 0                          | 26,0                     | 36,2                  | 21,19                  | 5,39         | 11,2             | 0          | 0           | 0            | A2                 |       |       |
| MPEF-PALIN145 | 0             | 0     | 0                          | 26,9                     | 17,4                  | 8,96                   | 27,05        | 19,8             | 0          | 0           | 0            | A1                 |       |       |
| MPEF-PALIN144 | 0             | 0     | 0                          | 38,5                     | 37,0                  | 6,42                   | 7,39         | 8,0              | 2,7        | 0           | 0            | A2                 | 0,734 |       |
| MPEF-PALIN143 | 0             | 0     | 0                          | 16,6                     | 37,9                  | 25,56                  | 9,65         | 8,0              | 2,3        | 0           | 0            |                    |       |       |
| MPEF-PALIN142 | 0             | 0     | 0                          | 29,1                     | 24,7                  | 10,24                  | 23,09        | 12,85            | 0          | 0           | 0            |                    |       |       |
| MPEF-PALIN141 | 0             | 0     | 0                          | 33,4                     | 32,3                  | 3,54                   | 19,22        | 11,57            | 0          | 0           | 0            | A1                 |       |       |
| MPEF-PALIN140 | 0             | 0,20  | 0                          | 24,7                     | 31,4                  | 5,57                   | 24,65        | 13,52            | 0          | 0           | 0            |                    | 1,13  |       |
| MPEF-PALIN139 | 1,81          | 0     | 2,17                       | 8,5                      | 11,2                  | 3,08                   | 20,29        | 7,61             | 0,36       | 44,93       | 0            | C                  | 6,895 |       |
| MPEF-PALIN138 | 1,30          | 0     | 0                          | 26,1                     | 24,6                  | 1,47                   | 21,99        | 24,6             | 0          | 0           | 0            | A1                 |       |       |
| MPEF-PALIN137 | 0             | 0,18  | 0,18                       | 22,4                     | 15,8                  | 7,53                   | 18,10        | 8,24             | 8,66       | 19,00       | 0            |                    |       |       |
| MPEF-PALIN136 | 7,49          | 2,25  | 0,94                       | 10,7                     | 20,2                  | 4,87                   | 11,61        | 6,37             | 8,80       | 26,22       | 0,56         | C                  | 4,31  |       |
| MPEF-PALIN135 | 0,4           | 0     | 0                          | 17,7                     | 17,3                  | 3,38                   | 37,59        | 18,23            | 0,38       | 5,08        | 0            |                    |       |       |
| MPEF-PALIN134 | 1,72          | 3,82  | 1,15                       | 19,1                     | 18,1                  | 3,24                   | 17,75        | 6,87             | 15,65      | 12,40       | 0,19         | A1                 | 11,17 |       |
| MPEF-PALIN133 | 3,90          | 1,06  | 0,35                       | 9,6                      | 27,7                  | 0,35                   | 23,05        | 8,87             | 12,23      | 12,94       | 0            |                    |       |       |
| MPEF-PALIN132 | 3,08          | 0     | 0,96                       | 11,6                     | 31,0                  | 1,93                   | 25,24        | 12,72            | 3,08       | 10,41       | 0            |                    |       | 3,397 |
| MPEF-PALIN131 | 15,5          | 0,33  | 2,12                       | 26,1                     | 20,2                  | 0,49                   | 22,35        | 9,79             | 1,63       | 1,47        | 0            |                    |       |       |
| MPEF-PALIN130 | 6,04          | 0,17  | 2,07                       | 10,7                     | 14,2                  | 0,35                   | 18,13        | 7,25             | 10,88      | 30,22       | 0            | C                  |       |       |
| MPEF-PALIN129 | 7,07          | 0,19  | 0,19                       | 11,7                     | 11,1                  | 0,2                    | 20,65        | 7,46             | 18,16      | 23,33       | 0            |                    | 11,96 |       |
| MPEF-PALIN128 | 7,81          | 32,38 | 0,95                       | 17,0                     | 16,8                  | 1,52                   | 9,52         | 2,86             | 4,58       | 6,48        | 0,19         | B                  | 4,3   |       |
| MPEF-PALIN127 | 3,65          | 8,25  | 0,96                       | 16,5                     | 12,1                  | 0,2                    | 13,63        | 4,41             | 15,54      | 24,76       | 0            | C                  |       |       |
| MPEF-PALIN126 | 13,07         | 0,35  | 0,87                       | 27,9                     | 23,2                  | 3,66                   | 18,64        | 6,45             | 1,05       | 4,53        | 0,35         | A1                 |       |       |
| MPEF-PALIN125 | 16,45         | 6,36  | 6,36                       | 16,1                     | 15,1                  | 2,80                   | 18,13        | 3,74             | 3,18       | 11,78       | 0            | C                  | 6,05  |       |
| MPEF-PALIN124 | 12,64         | 1,76  | 8,48                       | 10,24                    | 13,12                 | 10,9                   | 11,36        | 3,04             | 12,96      | 15,52       | 0            |                    |       |       |
| MPEF-PALIN123 | 9,37          | 27,75 | 0                          | 8,8                      | 13,0                  | 3,42                   | 12,07        | 7                | 11,7       | 4,32        | 2,52         | B                  | 0,601 |       |
| MPEF-PALIN122 | 26,97         | 0     | 0                          | 10,2                     | 12,3                  | 2,89                   | 6,17         | 4                | 10,8       | 24,28       | 2,31         | C                  |       |       |
| MPEF-PALIN121 | 17,7          | 0     | 0                          | 19,2                     | 23,7                  | 9,54                   | 16           | 8                | 2,31       | 2,93        | 0,62         | A1                 | 1,01  |       |
| MPEF-PALIN120 | 17,0          | 0,57  | 1,15                       | 17,6                     | 15,3                  | 1,72                   | 12,02        | 5,15             | 0,38       | 29,01       | 0,19         | C                  |       |       |
| MPEF-PALIN119 | 9,52          | 9,84  | 3,87                       | 7,6                      | 8,9                   | 1,13                   | 17,26        | 7,10             | 0          | 34,84       | 0            |                    | 6,81  |       |
| MPEF-PALIN118 | 0,00          | 0     | 0                          | 2,3                      | 3,3                   | 0,8                    | 17,6         | 7,2              | 43,6       | 23,1        | 2            | D1                 | 0,13  |       |
| MPEF-PALIN117 | 0,00          | 0     | 0                          | 2,9                      | 10,2                  | 0                      | 59,22        | 27,65            | 0          | 0           | 0            |                    | 2,04  |       |
| MPEF-PALIN116 | 1,73          | 16,35 | 2,31                       | 7,3                      | 10,6                  | 2,31                   | 12,5         | 5,2              | 0          | 39,8        | 1,92         | C                  | 5,904 |       |
| MPEF-PALIN115 | 0             | 0     | 0                          | 10,9                     | 19,4                  | 2,64                   | 24,67        | 11,86            | 24,11      | 0,38        | 6,03         |                    |       |       |
| MPEF-PALIN114 | 0             | 0     | 0                          | 13,4                     | 22,2                  | 9,71                   | 25,09        | 14,10            | 9,71       | 1,29        | 4,58         | A1                 |       |       |
| MPEF-PALIN113 | 0             | 2,35  | 0                          | 22,2                     | 14,4                  | 13,00                  | 36,10        | 10,83            | 1,08       | 0           | 0            |                    |       | 1,41  |
| MPEF-PALIN112 | 0             | 0     | 0                          | 19,4                     | 20,2                  | 7,13                   | 41,78        | 11,09            | 0,40       | 0           | 0            |                    |       |       |
| MPEF-PALIN111 | 0             | 1,32  | 0                          | 28,1                     | 19,2                  | 10                     | 25,47        | 14,72            | 1,13       | 0           | 0            |                    |       |       |
| MPEF-PALIN110 | 0             | 0     | 0                          | 24,0                     | 37,6                  | 11,65                  | 10,04        | 11,83            | 3,76       | 1,08        | 0            | A2                 | 0,642 |       |
| MPEF-PALIN109 | 0             | 0     | 0                          | 10,6                     | 33,5                  | 6,69                   | 39,61        | 9,7              | 0          | 0           | 0            |                    |       |       |
| MPEF-PALIN108 | 0             | 3,4   | 0                          | 10,6                     | 39,3                  | 9,98                   | 21,16        | 9,38             | 2,00       | 0           | 4,19         | A1                 | 1,65  |       |
| MPEF-PALIN107 | 0             | 0     | 0                          | 16,2                     | 26,4                  | 9,34                   | 32,32        | 14,90            | 0,54       | 0,36        | 0            |                    |       |       |
| MPEF-PALIN106 | 0             | 31,15 | 0                          | 16,3                     | 19,8                  | 7,34                   | 16,67        | 8,33             | 0,40       | 0           | 0            | B                  | 2,601 |       |
| MPEF-PALIN105 | 0             | 1,82  | 0                          | 21,6                     | 23,6                  | 18,18                  | 26,18        | 7,45             | 0,55       | 0,5         | 0            | A1                 |       |       |
| MPEF-PALIN104 | 0             | 22,42 | 0                          | 11,3                     | 19,8                  | 10,52                  | 18,65        | 10,71            | 0,20       | 0,2         | 6,15         | B                  | 3,23  |       |
| MPEF-PALIN103 | 0             | 0     | 0                          | 2,6                      | 38,2                  | 5,12                   | 41,13        | 11,52            | 1,28       | 0,2         | 0            | A1                 | 2,224 |       |
| MPEF-PALIN102 | 0             | 0     | 0                          | 0,6                      | 16,2                  | 1,68                   | 1,68         | 4,28             | 27,19      | 47,5        | 0,9          | D2                 | 0,181 |       |
| MPEF-PALIN101 | 0             | 0     | 0                          | 19,4                     | 55,3                  | 8,02                   | 4,99         | 3,21             | 8,02       | 0,9         | 0,2          | A2                 | 2,023 |       |
| MPEF-PALIN100 | 0             | 0     | 0,38                       | 0,9                      | 7,7                   | 9,38                   | 16,89        | 11,63            | 20,64      | 21,6        | 10,9         | D1                 |       |       |
